# Supplementary material
Source: PubMed Central journal article supplement (PMC2669546)
Supplement: NIHMS83716-supplement-01.pdf [file NIHMS83716-supplement-01.pdf]

Type of file: table

Label: Tab 1

Filename: Table1.pdf

Supplementary Table 1. TSR-encoding mRNAs downregulated by Myc. “Fold repression” and “P-value” refer to differences in expression levels between the two sets of tumors (RasGfp and RasGfpMyc), per microarray data.

| Thrombospondin-related proteins                     | Fold repression | P-value |
|-----------------------------------------------------|-----------------|---------|
| spondin-1 (f-spondin)                               | 8.0             | 0.05    |
| Thrombospondin 1                                    | 7.7             | 0.006   |
| ADAMTS2                                             | 7.6             | 0.063   |
| WISP2                                               | 6.0             | 0.13    |
| Thrombospondin repeat containing [protein] 1        | 5.7             | 0.003   |
| Clusterin                                           | 5.3             | 0.003   |
| CTGF, connective tissue growth factor               | 5.0             | 0.001   |
| SPARC (secreted acidic cysteine rich glycoprotein)  | 3.3             | 0.1     |
| ADAMTS12                                            | 3.1             | 0.022   |
| Thrombospondin type I domain containing [protein] 6 | 2.3             | 0.008   |

Type of file: table

Label: Tab2

Filename: Table2.pdf

Supplementary Table 2. TSR proteins that are predicted targets of the miR17-92 cluster. Myc-target genes are shown in bold.

| Gene            | Gene Description                                              | Suppressed by Myc at mRNA level | Target of which miRNA                       | Number of hits | Distance from the start of the 3' UTR | p-value (per Sanger Inst algorithm) |
|-----------------|---------------------------------------------------------------|---------------------------------|---------------------------------------------|----------------|---------------------------------------|-------------------------------------|
| <b>CTGF</b>     | <b>Connective tissue growth factor</b>                        | Yes                             | <b>miR-19a, b<br/>miR-18</b>                | <b>4</b>       | <b>1030, 1030<br/>1032, 1033</b>      | <b>0.0015</b>                       |
| THSD3           | thrombospondin, type I domain containing 3 isoform 3          | not on array                    | miR-17-5p<br>miR-20<br>miR-18               | 4              | 1170<br>1171<br>1172, 1173            |                                     |
| ADAMTS18        | A disintegrin and metalloproteinase with Tsp motifs 18        | No                              | miR-17-5p<br>miR-20<br>miR-19a,b            | 4              | 181<br>183<br>236, 236                |                                     |
| <b>ADAMTS12</b> | <b>A disintegrin and metalloproteinase with Tsp motifs 12</b> | Yes                             | <b>miR-19a, b<br/>miR-17-3p</b>             | <b>3</b>       | <b>21, 21<br/>26</b>                  |                                     |
| <b>THBS1</b>    | <b>Thrombospondin 1</b>                                       | Yes                             | <b>miR-18/19<br/>(depending on species)</b> | <b>2</b>       | <b>33, 35</b>                         | <b>0.0004</b>                       |
| THSD1           | thrombospondin, type I domain containing 1                    | not on array                    | miR-19a, b                                  | 2              | 78, 78                                | 0.0003                              |
| ADAMTS1         | A disintegrin and metalloproteinase with Tsp motifs 1         | No                              | miR-20                                      | 1              | 999                                   | 0.0007                              |
| ADAMTS6         | A disintegrin and metalloproteinase with Tsp motifs 6         | No                              | miR-18                                      | 1              | 192                                   |                                     |
| <b>WISP2</b>    | <b>WNT1 inducible signaling pathway protein 2</b>             | Yes                             | <b>miR-17-3p</b>                            | <b>1</b>       | <b>89</b>                             | <b>0.0003</b>                       |
| BAI3            | Brain-specific angiogenesis inhibitor 3                       | Brain-specific                  | miR-17-3p                                   | 1              | 543                                   |                                     |

Type of file: table

Label: Tab3

Filename: Table3.pdf

Supplementary Table 3. Sequences of qRT-PCR primers and 2'-O-methyl oligoribonucleotides.

| Gene                                     | Sense oligo              | Antisense oligo          |
|------------------------------------------|--------------------------|--------------------------|
| <b>qRT-PCR primers</b>                   |                          |                          |
| Thrombospondin 1                         | AAGCGCCTATTTACTTCCCACTAG | TCCTTTCTTTGACATGCCTGAA   |
| CTGF                                     | CACCTAAAATCGCCAAGCCTG    | AGTTCGTGTCCCTTACTTCCTG   |
| murine miR-17-92<br>(primary transcript) | ACGCACTTGTTTCAGTTCCG     | TAGTAACCCACCCCCATTCC     |
| human miR-17-92<br>(primary transcript)  | CTGTGCGCCAATCAAACCTG     | GTCACAATCCCCACCAAAC      |
| $\beta$ -actin                           | TTCGTTGCCGGTCCACA        | ACCAGCGCAGCGATATCG       |
| <b>2'-O-methyl oligoribonucleotides</b>  |                          |                          |
| miR-17-5p                                |                          | ACUACCUGCACUGUAAGCACUUUG |
| miR-18a                                  |                          | UAUCUGCACUAGAUGCAC CUUA  |
| miR-19a                                  |                          | UCAGUUUUGCAUAGAUUUGCACA  |
| miR-19b-1                                |                          | UCAGUUUUGCAUGGAUUUGCACA  |
| miR-20a                                  |                          | CUACCUGCACUAUAAGCACUUUA  |
| miR-92-1                                 |                          | CAGGCCGGGACAAGUGCAAUA    |
| miR-scrambled                            |                          | AAAACCUUUUGACCGAGCGUGUU  |
